# Supplementary material for: A genome-to-proteome atlas charts natural variants controlling proteome diversity and forecasts their fitness effects
Source: PubMed Central journal article supplement — bioRxiv. 2024 Oct 22:2024.10.18.619054. Preprint. [Version 1] doi: 10.1101/2024.10.18.619054 (PMC11526991; doi:10.1101/2024.10.18.619054), 2024-10-22
Supplement: media-1.pdf [file media-1.pdf]

- 1 **Supplemental Information**
- 2 To accompany Jakobson\*, Hartl\*, *et al.*
- 3
- 4 **Contents:**
- 5 Key Resources Table
- 6 Figures S1-S7
- 7 Table S6

## 8 Key Resources Table

| Reagent or resource                          | Source            | Identifier                                                  |
|----------------------------------------------|-------------------|-------------------------------------------------------------|
| <i>Chemicals</i>                             |                   |                                                             |
| Yeast nitrogen base                          | RPI               | Y20040                                                      |
| Glucose                                      | Fisher            | D16-3                                                       |
| Uracil                                       | Sigma             | U0750                                                       |
| Agar                                         | IBI               | IB49170                                                     |
| Fluconazole                                  | TCI               | F0677                                                       |
| Ethanol (95%)                                | Fisher            | 04-355-226                                                  |
| Water (LC-MS grade)                          | Fisher Scientific | Cat 10509404; CAS: 7732-18-5                                |
| Acetonitrile (LC-MS grade)                   | Fisher Scientific | Cat 10489553; CAS: 75-05-8                                  |
| Methanol (LC-MS grade)                       | Fisher Scientific | Cat 10767665; CAS: 67-56-1                                  |
| Formic acid (LC-MS grade)                    | Fisher Scientific | Cat 5.33002; CAS: 64-18-6                                   |
| Dithiothreitol ( $\geq 99.5\%$ )             | Sigma Aldrich     | Cat 43815; CAS: 3483-12-3                                   |
| Iodoacetamide ( $\geq 99\%$ )                | Sigma Aldrich     | Cat I1149; CAS: 144-48-9                                    |
| Ammonium Bicarbonate                         | Sigma Aldrich     | Cat 40867; CAS: 1066-33-7                                   |
| Urea                                         | Sigma Aldrich     | Cat 33247                                                   |
| Trypsin/Lys-C (Mass Spec Grade)              | Promega           | V5072                                                       |
| Solid-glass beads (borosilicate, diam. 4 mm) | Sigma Aldrich     | Cat Z143936                                                 |
| <i>Deposited data</i>                        |                   |                                                             |
| Mass spectrometry data                       | This study        | Will be made available on the PRIDE archive upon acceptance |
| <i>Experimental models: Strains</i>          |                   |                                                             |
| RM11 haploid                                 | 34                | YDJ6649                                                     |

|                                                                                                                                                                                                                                                                                      |            |         |
|--------------------------------------------------------------------------------------------------------------------------------------------------------------------------------------------------------------------------------------------------------------------------------------|------------|---------|
| YJM975 haploid                                                                                                                                                                                                                                                                       | 34         | YDJ6635 |
| YJM975 <i>ERG11</i> <sup>122014T&gt;C</sup>                                                                                                                                                                                                                                          | 34         | YDJ8281 |
| YJM975 <i>ERG11</i> <sup>Asn433Lys</sup>                                                                                                                                                                                                                                             | 34         | YDJ8436 |
| YJM975 <i>ERG11</i> <sup>122014T&gt;C;</sup><br>Asn433Lys                                                                                                                                                                                                                            | 34         | YDJ8437 |
| RM11 <i>MCR1</i> <sup>G&gt;A</sup>                                                                                                                                                                                                                                                   | This study | YDJ8524 |
| RM11 <i>NCP1</i> <sup>A&gt;T</sup>                                                                                                                                                                                                                                                   | This study | YDJ8525 |
| RM11 <i>SER2</i> <sup>G&gt;A</sup>                                                                                                                                                                                                                                                   | This study | YDJ8526 |
| RM11 <i>AAT2</i> <sup>G&gt;A</sup>                                                                                                                                                                                                                                                   | This study | YDJ8527 |
| YJM975 <i>GCSI</i> <sup>C&gt;T</sup>                                                                                                                                                                                                                                                 | This study | YDJ8528 |
| RM11 <i>IRA2</i> <sup>G&gt;A</sup>                                                                                                                                                                                                                                                   | This study | YDJ8578 |
| YJM975 <i>IRA2</i> <sup>A&gt;G</sup>                                                                                                                                                                                                                                                 | This study | YDJ8529 |
| <i>Oligonucleotides</i>                                                                                                                                                                                                                                                              |            |         |
| <i>MCR1</i> CRISPEY editing oligo<br>GAGTTACTGTCTGTTTTTC<br>CTGTTACTTACTTTGTTG<br>ACGACAAGCAAGATGAC<br>CAAGACTTTGATGGTGA<br>AATTAGTTTCATCTCCAA<br>AGATTTTATTCAGGAGC<br>ATGTTCCAGGTCCAAAG<br>GAAACCCGTTTCTTCTGA<br>CGTAAGGGTGCGCACAA<br>GACTTTGATGGTGAAAT<br>GTTTCAGAGCTATGCTGG<br>AA | This study | CMJP697 |
| <i>NCP1</i> CRISPEY editing oligo<br>GAGTTACTGTCTGTTTTTC<br>CTGGTCAACCCGCTATTG<br>TTCTCCAGCCAGCTTTTA<br>TCGTTTTGCATTTTTTTTT<br>CGGGCTGCTTTTCGTTCT<br>TCGAGGACAAACGCACC<br>TGTAAGCTCAGAGGAA                                                                                           | This study | CMJP703 |

|                                                                                                                                                                                                                                                                                      |            |         |
|--------------------------------------------------------------------------------------------------------------------------------------------------------------------------------------------------------------------------------------------------------------------------------------|------------|---------|
| ACCCGTTTCTTCTGACGT<br>AAGGGTGCGCAATCGTT<br>TTGCATATTTTTTTGTTTC<br>AGAGCTATGCTGGAA                                                                                                                                                                                                    |            |         |
| <i>SER2</i> CRISPEY editing oligo<br>GAGTTACTGTCTGTTTTTC<br>CTTTCTTGGCTACACCGA<br>TGATGAAATATACAATA<br>GACAATGAAGAAAATAA<br>TGATAGATAGATGTAAT<br>AGAGTTTCTTTTTAAAAT<br>TGTTTATTTAAACTGAGG<br>AAACCCGTTTCTTCTGAC<br>GTAAGGGTGCGCAGACA<br>ATGAAGAAAATAATGAG<br>TTTCAGAGCTATGCTGGA<br>A | This study | CMJP721 |
| <i>AAT2</i> CRISPEY editing oligo<br>GAGTTACTGTCTGTTTTTC<br>CTAACTGCGTGGGTTTCT<br>TCAAGTCGTTTAACCATT<br>TGAGGAGTCAATCCTGT<br>AAAGGAGAACATCCCGC<br>ATTGATTTACTATATGAT<br>CCCAGTTGCCAGGAAGG<br>AAACCCGTTTCTTCTGAC<br>GTAAGGGTGCGCATTGA<br>GGAGTCAACCCTGTAAG<br>TTTCAGAGCTATGCTGGA<br>A | This study | CMJP707 |
| <i>GCSI</i> CRISPEY editing oligo<br>GAGTTACTGTCTGTTTTTC<br>CTAATCCATACATTTCTT<br>ATTTGCACCAATCTTTTG<br>CAATTGCAAAAGACGCC<br>TACGGGTATCTGGGTCC<br>ACTTTCCAATCTGACATG<br>CTCTATAATCCGCGAGG<br>AAACCCGTTTCTTCTGAC<br>GTAAGGGTGCGCAGCAA<br>TTGCAAAAGACGCCTGG<br>TTTCAGAGCTATGCTGGA<br>A | This study | CMJP706 |

|                                                                                                                                                                                                                                                                                               |            |                                                                                                           |
|-----------------------------------------------------------------------------------------------------------------------------------------------------------------------------------------------------------------------------------------------------------------------------------------------|------------|-----------------------------------------------------------------------------------------------------------|
| <i>IRA2</i> CRISPEY editing oligo (RM>YJM)<br>GAGTTACTGTCTGTTTTTC<br>CTAAGTTCAATACAAGA<br>ACTTTGCAAATTTTACAA<br>AATATGATCAGTCATGTT<br>CATGGAAACATTCTAAC<br>GACTTTGAGTTCCTCGAT<br>TCTCCCCGCCACAAGG<br>AAACCCGTTTCTTCTGAC<br>GTAAGGGTGCGCAAGTA<br>TGATCAGTCATGTTTCAGT<br>TTCAGAGCTATGCTGGA<br>A | This study | CMJP709                                                                                                   |
| <i>IRA2</i> CRISPEY editing oligo (YJM>RM)<br>GAGTTACTGTCTGTTTTTC<br>CTAAGTTCAATACAAGA<br>ACTTTGCAAATTTTACAA<br>AGTATGATCAGTCATGTT<br>CATGGAAACATTCTAAC<br>GACTTTGAGTTCCTCGAT<br>TCTCCCCGCCACAAGG<br>AAACCCGTTTCTTCTGAC<br>GTAAGGGTGCGCAAATA<br>TGATCAGTCATGTTTCAGT<br>TTCAGAGCTATGCTGGA<br>A | This study | CMJP710                                                                                                   |
| <i>Recombinant DNA</i>                                                                                                                                                                                                                                                                        |            |                                                                                                           |
| CRISPEY editing plasmid: PDJ2318                                                                                                                                                                                                                                                              | 34         | PDJ2318                                                                                                   |
| <i>Software and algorithms</i>                                                                                                                                                                                                                                                                |            |                                                                                                           |
| DSSP                                                                                                                                                                                                                                                                                          | 84         | <a href="https://swift.cmbi.umcn.nl/gv/dssp/index.html">https://swift.cmbi.umcn.nl/gv/dssp/index.html</a> |
| DIA-NN                                                                                                                                                                                                                                                                                        | 26         | <a href="https://github.com/vdemichev/DiaNN">https://github.com/vdemichev/DiaNN</a>                       |
| maxLFQ                                                                                                                                                                                                                                                                                        | 82         | <a href="https://rdrr.io/cran/iq/man/maxLFQ.html">https://rdrr.io/cran/iq/man/maxLFQ.html</a>             |
| <i>Other</i>                                                                                                                                                                                                                                                                                  |            |                                                                                                           |

|                                         |            |                                                                                                                                                                                                                                                             |
|-----------------------------------------|------------|-------------------------------------------------------------------------------------------------------------------------------------------------------------------------------------------------------------------------------------------------------------|
| Custom genetic mapping code             | This study | <a href="https://github.com/cjakobson/pqtl-mapping">https://github.com/cjakobson/pqtl-mapping</a>                                                                                                                                                           |
| Genetic mapping dependencies            | This study | <a href="https://www.dropbox.com/scl/fo/3xbcbe9ivwz8aahrk137/APGxHor01S7jnNX3a1Yk3Og?rlkey=yx81ckrtaq8eb5pu80ggprjhs&amp;dl=0">https://www.dropbox.com/scl/fo/3xbcbe9ivwz8aahrk137/APGxHor01S7jnNX3a1Yk3Og?rlkey=yx81ckrtaq8eb5pu80ggprjhs&amp;dl=0</a>     |
| Custom protein structure analysis code  | This study | <a href="https://github.com/cjakobson/pop-gen-structure">https://github.com/cjakobson/pop-gen-structure</a>                                                                                                                                                 |
| Protein structure analysis dependencies | This study | <a href="https://www.dropbox.com/scl/fo/1e2voq9djr79p2ehxqvs3/A_Gecke84_fLbzrsis2Ncpjk?rlkey=g5etvtwhay27j4y0sh6dh8dh7&amp;dl=0">https://www.dropbox.com/scl/fo/1e2voq9djr79p2ehxqvs3/A_Gecke84_fLbzrsis2Ncpjk?rlkey=g5etvtwhay27j4y0sh6dh8dh7&amp;dl=0</a> |

9

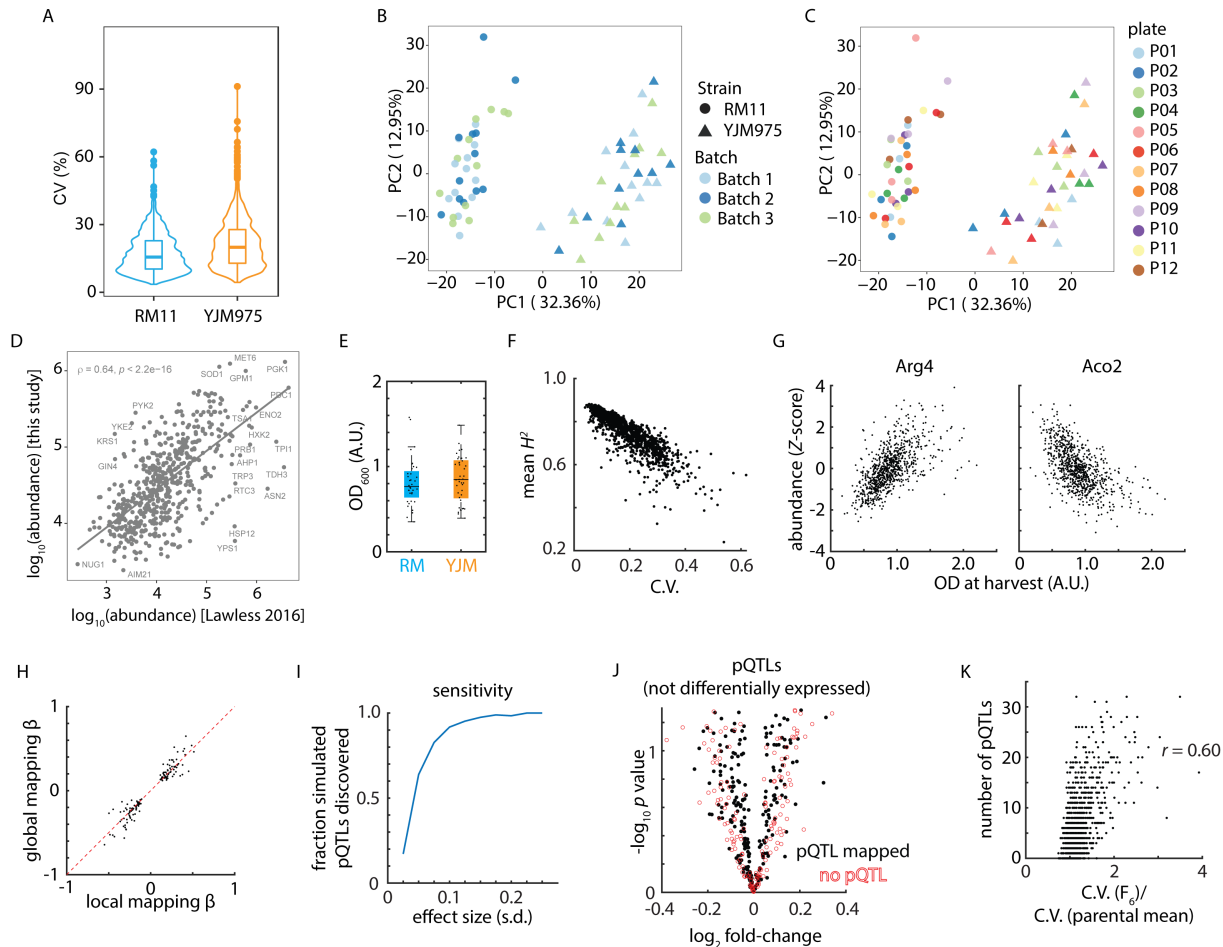

10  
 11 **Figure S1. To accompany Figure 1.** (A) Distribution of coefficients of variation (CVs) of all  
 12 analyzed proteins ( $n=1225$ ) from biological replicates of RM11 ( $n=36$ ) and YJM975 ( $n=34$ )  
 13 distributed and processed in 12 plates and measured in 3 LC-MS batches. (B-C) Variation  
 14 according to principal components 1 and 2 of data described in (A) with only proteins without  
 15 missing values ( $n=850$ ) colored according to MS batch (B) or processing plate (C). (D) Median  
 16 protein abundances from  $n=851$  F<sub>6</sub> strains (ordinate) plotted and spearman correlated against  
 17 absolute quantitative protein data from Lawless<sup>85</sup> (abscissa) for matching proteins ( $n=538$ ). (E)  
 18 Harvest OD<sub>600</sub> of RM and YJM biological replicate samples. (F) Mean broad-sense heritability  
 19 (ordinate) as a function of technical variability (C.V.; abscissa). (G) Abundance of Arg4 (left) and  
 20 Aco2 (right) as a function of harvest OD<sub>600</sub> amongst the F<sub>6</sub> progeny. (H) Genetic mapping  
 21 coefficient (beta; units of st. dev.) from global (ordinate) and local (abscissa) approaches. Line of  
 22 parity is shown in a red dashed line. (I) Genetic mapping sensitivity (fraction of simulated pQTLs  
 23 discovered; ordinate) as a function of effect size (st. dev.; abscissa). Shown is the mean of  $N = 100$   
 24 simulations of protein traits with 50 pQTLs. (J) Volcano plot illustrating log<sub>2</sub> fold-change in  
 25 protein abundance (abscissa) and Benjamini-Hochberg-corrected  $t$  test  $p$  value (ordinate) between  
 26 the vineyard (RM) and clinical (YJM) parents highlighting proteins not differentially expressed  
 27 between the parents. Closed symbols have a mapped pQTL; open symbols have no identified  
 28 pQTLs.  $n = 36 - 39$ . (K) Number of pQTLs discovered (ordinate) as a function of normalized C.V.  
 29 amongst the F<sub>6</sub> progeny as compared to the mean C.V. in the parental isolates (abscissa).

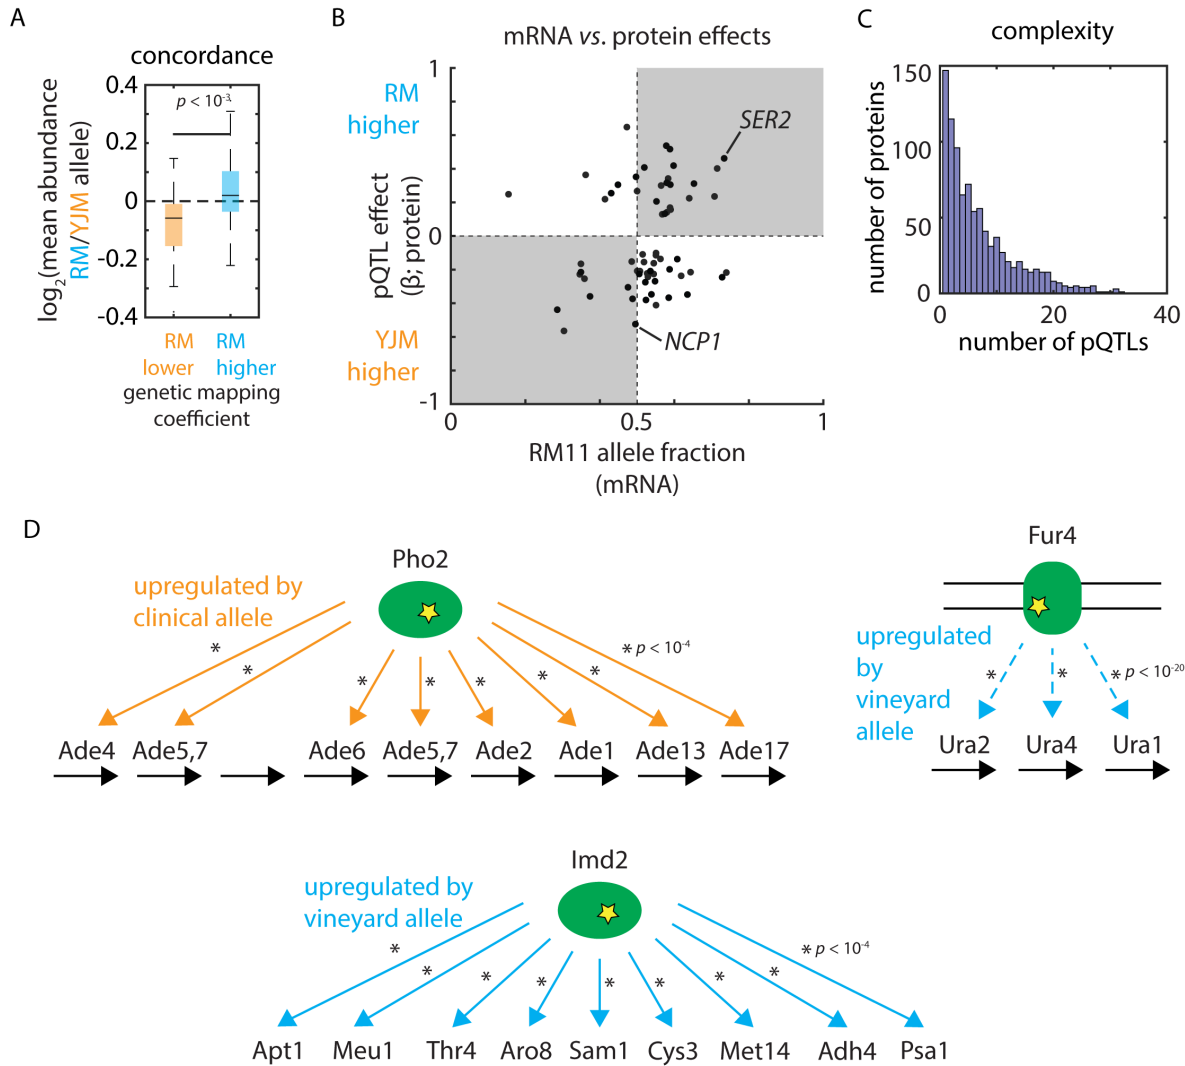

30  
 31 **Figure S2. To accompany Figure 2.** (A) Summary of replication across all *cis*-acting pQTLs we  
 32 discovered; shown is log<sub>2</sub> fold-change in mean protein abundance between 1,002 Yeast Genomes  
 33 strains bearing the RM and YJM alleles in *cis*, divided by whether genetic mapping predicted the  
 34 YJM or RM allele to exhibit higher protein level. *p* value by two-sided *t* test. (B) Predicted effect  
 35 on protein level from genetic mapping (ordinate) and measured effect on mRNA level from allele-  
 36 specific expression analysis (abscissa) for regulatory *cis*-pQTLs. Highlighted are *cis*-pQTLs  
 37 selected for reconstruction. (C) Frequency of proteins (ordinate) as a function of the number of  
 38 controlling pQTLs (abscissa). (D) Schematic of adenine biosynthetic pathway enzymes controlled  
 39 by Pho2, uracil biosynthetic pathway enzymes controlled by Fur4, and metabolic enzymes  
 40 controlled by Imd2.



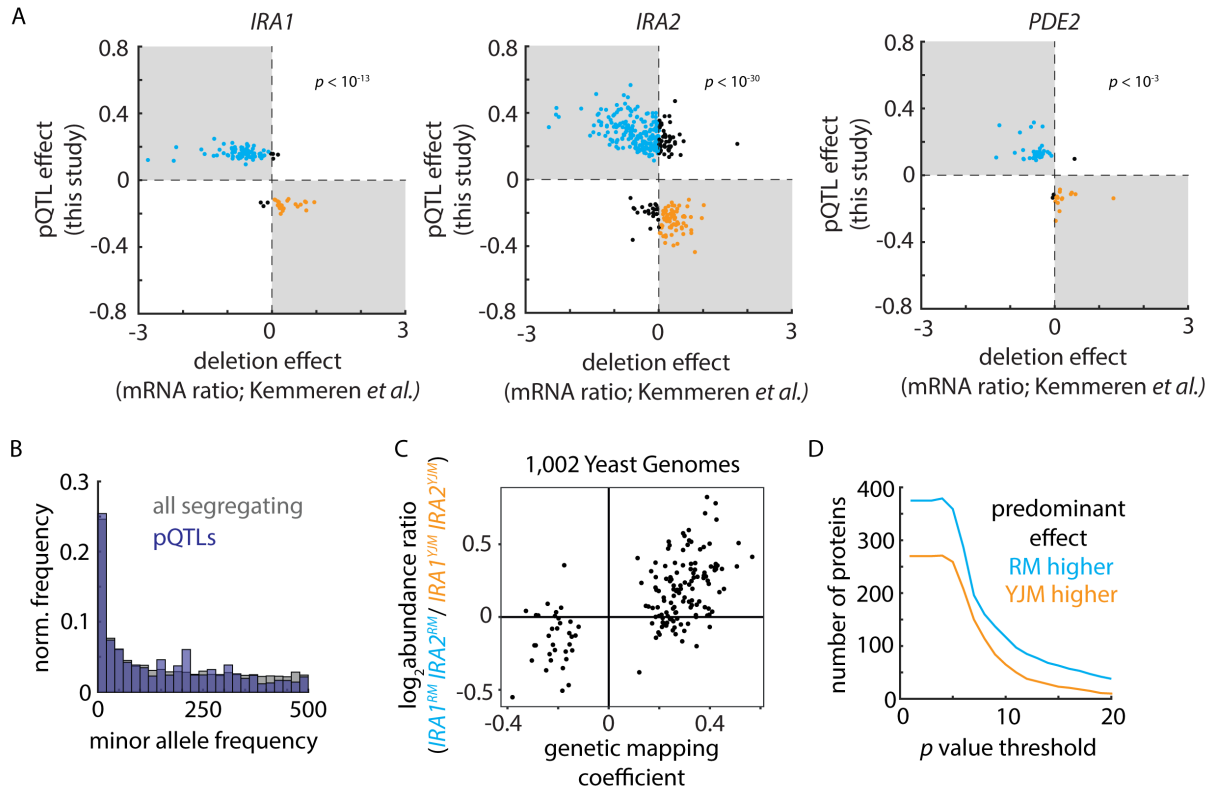

41  
 42 **Figure S3. To accompany Figure 3.** (A) Predicted effects of *trans* pQTNs from genetic mapping  
 43 (ordinate) as a function of measured mRNA effects of deleting the corresponding gene (abscissa)  
 44 <sup>44</sup> for *IRA1*, *IRA2*, and *PDE2*, as indicated.  $p$  values by  $t$  statistic. (B) Normalized frequency  
 45 (ordinate) of minor allele frequencies amongst the 1,002 Genomes collection (abscissa) for pQTL  
 46 variants (blue) and all segregating variation amongst the  $F_6$  progeny (grey). (C) Relative  
 47 abundance of *Ira1* and *Ira2* targets (ordinate; identified by pQTL mapping) in wild yeast proteomes  
 48 bearing *IRA1<sup>RM</sup>* and *IRA2<sup>RM</sup>* alleles ( $n=5$ ) as compared to strains with *IRA1<sup>YJM</sup>* and *IRA2<sup>YJM</sup>* ( $n=371$ )  
 49 as a function of predicted effect from pQTL mapping (abscissa). (D) Number of proteins (ordinate)  
 50 predominantly controlled by RM-higher *trans* pQTL alleles (blue) or YJM-higher *trans* pQTL  
 51 alleles (orange) as a function of genetic mapping  $p$  value (abscissa).

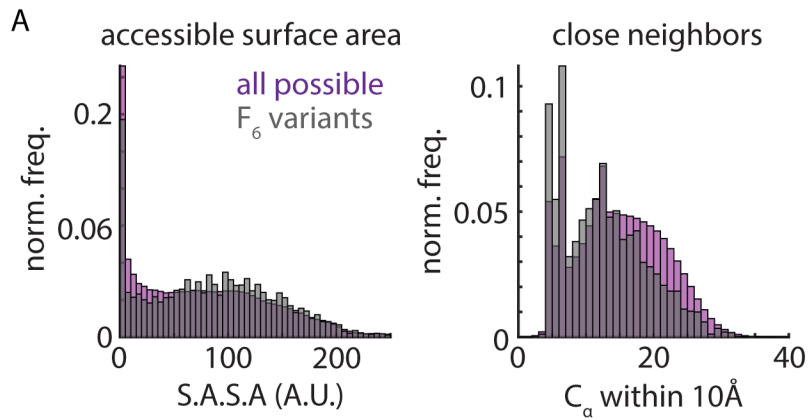

52  
 53 **Figure S4. To accompany Figure 4.** (A) Normalized frequencies of solvent-accessible surface  
 54 area (left) and number of  $C_\alpha$  within 10Å (right) for all possible missense SNPs (purple) and all  
 55 missense variants segregating in the  $F_6$  mapping panel (grey).

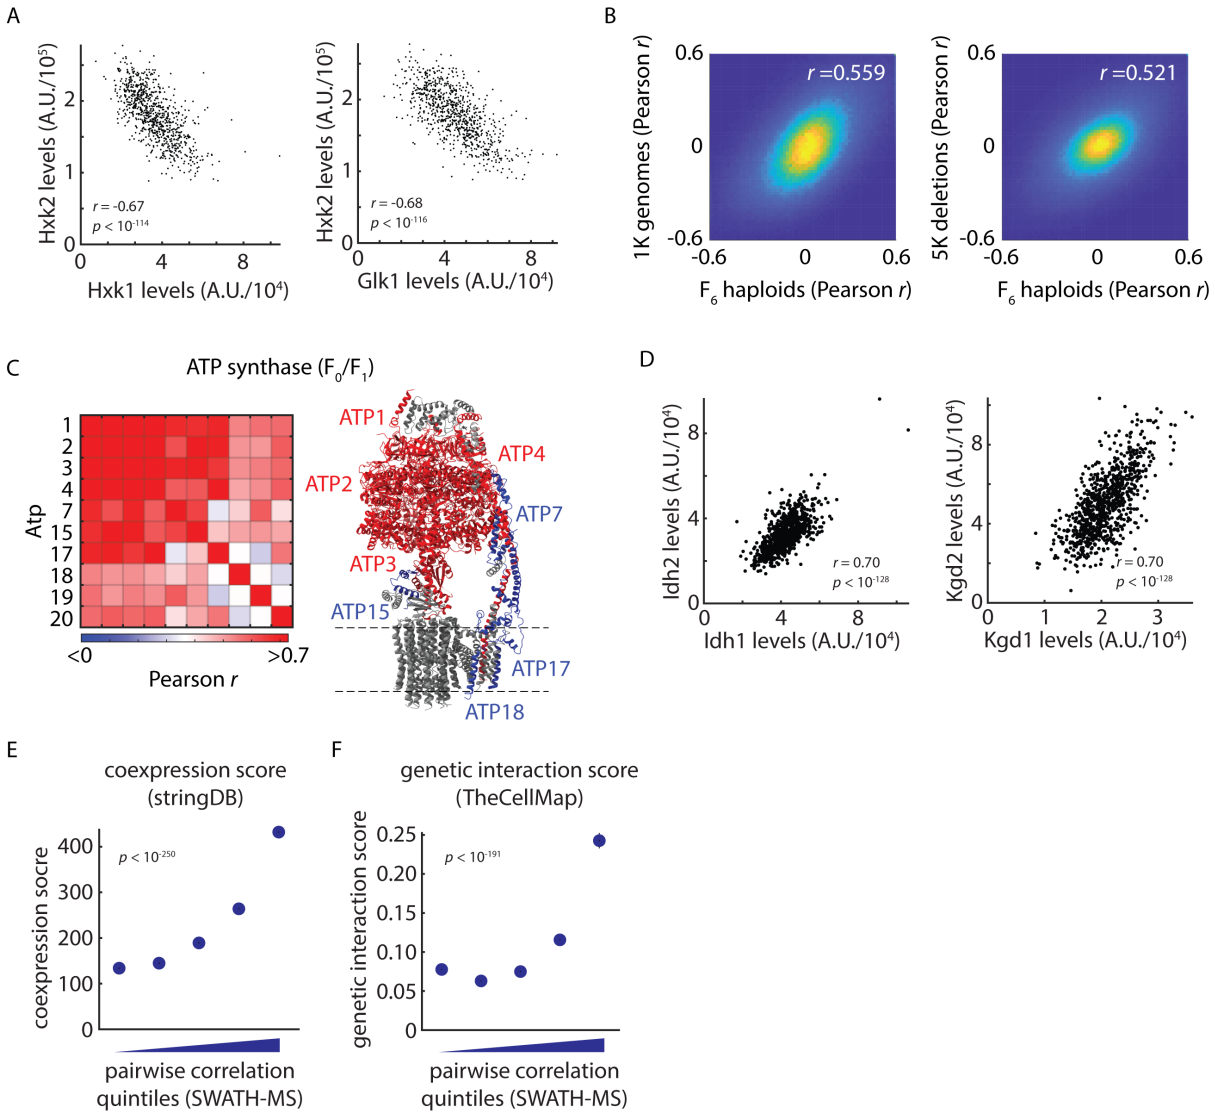

56  
 57 **Figure S5. To accompany Figure 5.** (A) Top: Hxk2 levels (ordinate) as a function of Hxk1 levels  
 58 (abscissa) amongst F<sub>6</sub> progeny. Bottom: As above, but for Hxk2 and Glk1. (B) Left: Correlation  
 59 between protein-protein correlations amongst 1,002 Genomes strains (ordinate)<sup>32</sup> and the same  
 60 statistic amongst the F<sub>6</sub> progeny (abscissa). Shown is Pearson's  $r$ . Right: As on the left, for protein-  
 61 protein correlations amongst precise deletions<sup>30</sup>. (C) Pairwise correlations of observed ATP  
 62 synthase components (left) and cryo-EM structure of the yeast ATP synthase (6CP6)<sup>86</sup> with  
 63 subunits highlighted as indicated (right). (D) Left: Idh2 levels (ordinate) as a function of Idh1  
 64 levels (abscissa) amongst F<sub>6</sub> progeny. Right: As left, but for Kgd2 and Kgd1. (E) Coexpression  
 65 score from stringDB for ascending quintiles of protein pairs sorted by SWATH-MS abundance  
 66 correlation. (F) As in (E) for the genetic interaction score from TheCellMap.

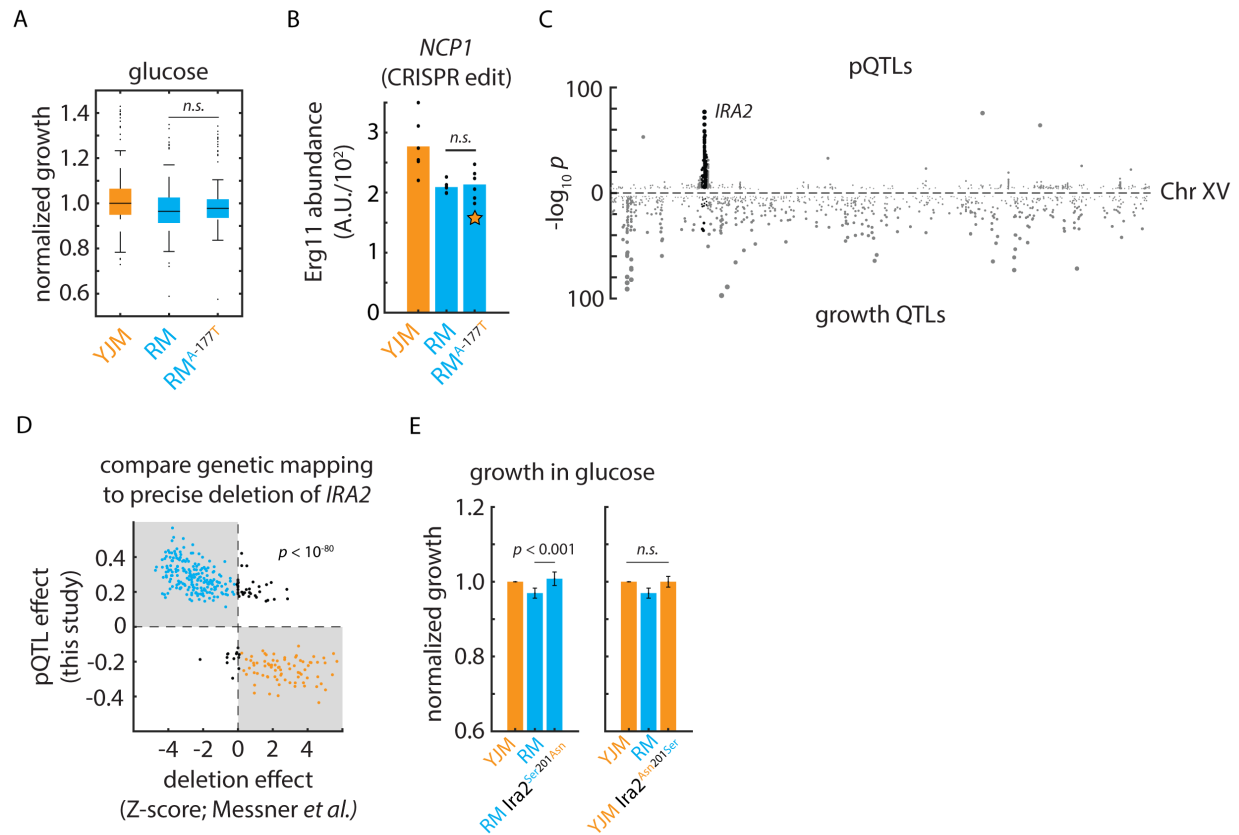

67  
68 **Figure S6. To accompany Figure 6.** (A) Growth in glucose of clinical (YJM), vineyard (RM),  
69 and CRISPR-edited RM  $NCP1^{\Delta-177T}$  mutant strains in glucose.  $n = 96$ ;  $p$  value by Student's  $t$  test.  
70 (B) CRISPR reconstruction and mass spectrometry to test the effect of the  $NCP1^{\Delta-177T}$  variant on  
71 Erg11 levels.  $n = 6$ ;  $p$  value by two-sided  $t$  test. (C) Miami plot of pQTLs (top) and growth QTLs  
72 (bottom) on Chromosome XV.  $IRA2$  pQTLs and QTLs are highlighted in black. (D) Predicted  
73  $IRA2$  pQTL effects from genetic mapping (this study; ordinate) as compared to measured effects  
74 of  $IRA2$  precise deletion (Z-scored by protein; <sup>30</sup>; abscissa) for all proteins predicted to be  
75 controlled by  $IRA2$ .  $p$  value from  $t$  statistic. Estimated abundances normalized to wild-type in each  
76 case. (E) Growth of clinical (YJM), vineyard (RM), and CRISPR-edited RM  $Ira2^{Ser201Asn}$  mutant  
77 (left) and YJM  $Ira2^{Asn210Ser}$  mutant (right) in glucose.  $n = 96$ ;  $p$  values by Student's  $t$  test.

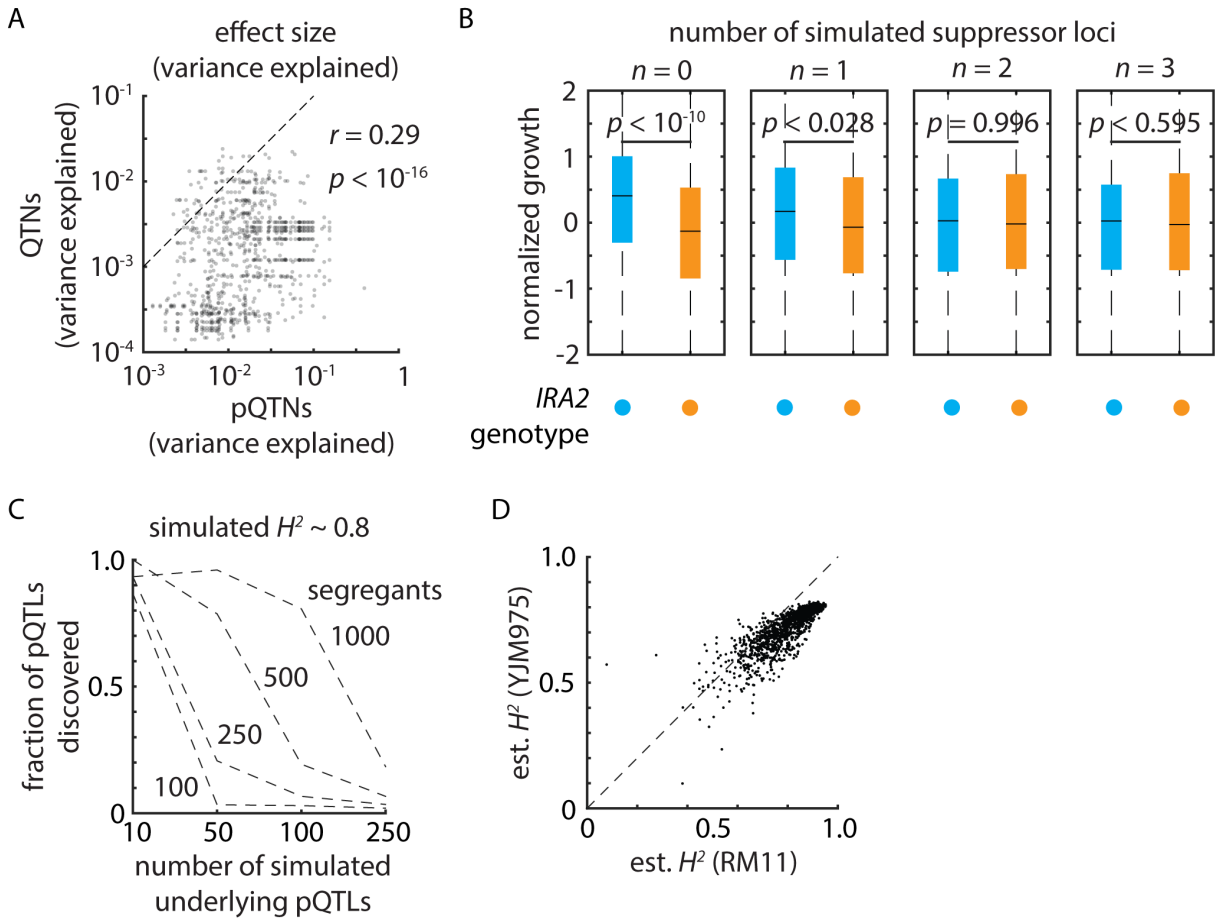

78  
 79 **Figure S7. To accompany Figure 7.**(A) Variance explained by phenotypic QTNs (ordinate) as a  
 80 function of variance explained by pQTLs mapped to the same variant (abscissa).  $r$  by Pearson's  
 81 correlation;  $p$  value from  $t$  statistic. (B) *In silico* simulations of the apparent effect of a linear QTL  
 82 at *IRA2* with the number of segregating suppressing alleles indicated.  $p$  value by  $t$  test. (C) Fraction  
 83 of simulated pQTLs discovered (ordinate) as a function of the number of true underlying simulated  
 84 pQTLs (abscissa) for hypothetical pQTL mapping panels with the number of segregants indicated.  
 85  $N = 3$  simulations for each parameter combination. (D) Estimated broad-sense heritability  $H^2$  in  
 86 YJM (ordinate) as a function of estimated  $H^2$  in RM (abscissa) for all measured proteins.

| <i>Upregulated in YJM975</i> |                       | <i>Upregulated in RM11</i> |                       |
|------------------------------|-----------------------|----------------------------|-----------------------|
| <b>TF</b>                    | <b><i>p</i> value</b> | <b>TF</b>                  | <b><i>p</i> value</b> |
| Sfp1                         | < 10 <sup>-22</sup>   | Sut1                       | < 10 <sup>-11</sup>   |
| Stb3                         | < 10 <sup>-16</sup>   | Msn2                       | < 10 <sup>-11</sup>   |
| Abf1                         | < 10 <sup>-10</sup>   | Msn4                       | < 10 <sup>-11</sup>   |
| Sum1                         | < 10 <sup>-10</sup>   | Hap3                       | < 10 <sup>-9</sup>    |
| Gcn4                         | < 10 <sup>-8</sup>    | Abf1                       | < 10 <sup>-9</sup>    |
| Tod6                         | < 10 <sup>-7</sup>    | Hap5                       | < 10 <sup>-9</sup>    |
| Dot6                         | < 10 <sup>-6</sup>    | Gis1                       | < 10 <sup>-9</sup>    |
| Arg81                        | < 10 <sup>-6</sup>    |                            |                       |
| Swi4                         | < 10 <sup>-4</sup>    |                            |                       |

88 **Supplemental Table S6.** PSCAN transcription factor target enrichments and *p* values for proteins  
89 up- and down-regulated in the YJM975 and RM11 parents.
